# Supplementary material
Source: PubMed Central journal article supplement (PMC5619964)
Supplement: ASN.2016121330SupplementaryData.pdf [file ASN.2016121330SupplementaryData.pdf]

**eTable 1.** Logistic regression models assessing the predictors of (a) glomerulosclerosis; (b) acute tubular injury; (c) IFTA; and (d) moderate to severe vascular disease among deceased donor kidneys

**(a) Glomerulosclerosis**

| Parameters                | Crude OR | 95% CI        | p-value          | Adjusted OR | 95% CI        | p-value          |
|---------------------------|----------|---------------|------------------|-------------|---------------|------------------|
| Donor age (years)         | 1.058    | 1.038 – 1.078 | <b>&lt;0.001</b> | 1.044       | 1.021 – 1.067 | <b>&lt;0.001</b> |
| Donor Male                | 0.967    | 0.606 – 1.544 | 0.889            | --          | --            | --               |
| Donor African-American    | 1.182    | 0.668 – 2.091 | 0.566            | --          | --            | --               |
| Donor BMI                 | 1.067    | 1.038 – 1.097 | <b>&lt;0.001</b> | 1.042       | 1.010 – 1.075 | <b>0.009</b>     |
| Donor hypertension        | 4.833    | 2.935 – 7.959 | <b>&lt;0.001</b> | 2.427       | 1.392 – 4.230 | <b>0.002</b>     |
| Donor diabetes            | 3.112    | 1.618 – 5.985 | <b>0.001</b>     | 1.404       | 0.689 – 2.860 | 0.350            |
| HLA mismatch              | 1.206    | 0.981 – 1.483 | 0.075            | --          | --            | --               |
| Donor Terminal Creatinine | 1.058    | 0.867 – 1.890 | 0.577            | --          | --            | --               |

**(b) Acute tubular injury**

| Parameters                 | Crude OR | 95% CI        | p-value          | Adjusted OR | 95% CI        | p-value          |
|----------------------------|----------|---------------|------------------|-------------|---------------|------------------|
| Donor age (years)          | 1.001    | 0.992 – 1.010 | 0.801            | 1.000       | 0.991 – 1.011 | 0.847            |
| Donor Male                 | 0.923    | 0.655 – 1.300 | 0.646            | 0.774       | 0.528 – 1.135 | 0.190            |
| Donor African-American     | 1.614    | 1.045 – 2.495 | <b>0.031</b>     | 1.487       | 0.926 – 2.387 | 0.101            |
| Donor BMI                  | 1.016    | 0.994 – 1.038 | 0.150            | --          | --            | --               |
| Donor hypertension         | 1.279    | 0.906 – 1.805 | 0.162            | --          | --            | --               |
| Donor diabetes             | 1.385    | 0.764 – 2.510 | 0.283            | --          | --            | --               |
| Cold ischemia time (hours) | 1.012    | 0.995 – 1.028 | 0.168            | 1.008       | 0.991 – 1.025 | 0.376            |
| HLA mismatch               | 0.982    | 0.858 – 1.124 | 0.792            | --          | --            | --               |
| Donor Terminal Creatinine  | 1.659    | 1.393 – 1.974 | <b>&lt;0.001</b> | 1.680       | 1.394 – 2.023 | <b>&lt;0.001</b> |

**(c) IFTA**

| Parameters                 | Crude OR | 95% CI        | p-value          | Adjusted OR | 95% CI        | p-value          |
|----------------------------|----------|---------------|------------------|-------------|---------------|------------------|
| Donor age (years)          | 1.068    | 1.046 – 1.090 | <b>&lt;0.001</b> | 1.052       | 1.027 – 1.077 | <b>&lt;0.001</b> |
| Donor Male                 | 0.998    | 0.623 – 1.598 | 0.992            | --          | --            | --               |
| Donor African-American     | 0.935    | 0.511 – 1.711 | 0.826            | --          | --            | --               |
| Donor BMI                  | 1.061    | 1.032 – 1.090 | <b>&lt;0.001</b> | 1.033       | 0.999 – 1.068 | 0.059            |
| Donor hypertension         | 5.009    | 3.025 – 8.296 | <b>&lt;0.001</b> | 2.431       | 1.348 – 4.383 | <b>0.003</b>     |
| Donor diabetes             | 3.873    | 2.044 – 7.339 | <b>&lt;0.001</b> | 1.982       | 0.978 – 4.020 | 0.058            |
| Cold ischemia time (hours) | 1.027    | 1.003 – 1.051 | <b>0.026</b>     | 1.018       | 0.990 – 1.047 | 0.212            |
| HLA mismatch               | 1.073    | 0.885 – 1.302 | 0.472            | --          | --            | --               |
| Donor Terminal Creatinine  | 1.029    | 0.841 – 1.259 | 0.780            | --          | --            | --               |

**(d) Moderate to severe vascular disease**

| Parameters                | Crude OR | 95% CI        | p-value          | Adjusted OR | 95% CI        | p-value          |
|---------------------------|----------|---------------|------------------|-------------|---------------|------------------|
| Donor age (years)         | 1.101    | 1.080 – 1.122 | <b>&lt;0.001</b> | 1.089       | 1.066 – 1.111 | <b>&lt;0.001</b> |
| Donor Male                | 0.617    | 0.432 – 0.881 | <b>0.008</b>     | 0.777       | 0.504 – 1.198 | 0.254            |
| Donor African-American    | 1.260    | 0.808 – 1.964 | 0.308            | --          | --            | --               |
| Donor BMI                 | 1.088    | 1.060 – 1.117 | <b>&lt;0.001</b> | 1.043       | 1.012 – 1.074 | <b>0.006</b>     |
| Donor hypertension        | 4.699    | 3.228 – 6.841 | <b>&lt;0.001</b> | 1.689       | 1.076 – 2.651 | <b>0.023</b>     |
| Donor diabetes            | 3.501    | 1.895 – 6.470 | <b>&lt;0.001</b> | 1.550       | 0.771 – 3.117 | 0.219            |
| HLA mismatch              | 1.065    | 0.922 – 1.230 | 0.394            | --          | --            | --               |
| Donor Terminal Creatinine | 1.102    | 0.945 – 1.285 | 0.214            | --          | --            | --               |

**eTable 2.** Logistic regression models assessing the predictors of (a) glomerulosclerosis; (b) acute tubular injury; (c) IFTA; and (d) moderate to severe vascular disease among living donor kidneys

(a) Glomerulosclerosis

| Parameters                | Crude OR | 95% CI         | p-value      | Adjusted OR | 95% CI | p-value |
|---------------------------|----------|----------------|--------------|-------------|--------|---------|
| Donor age (years)         | 1.052    | 1.014 – 1.093  | <b>0.008</b> | --          | --     | --      |
| Donor Male                | 0.595    | 0.249 – 1.422  | 0.243        | --          | --     | --      |
| Donor African-American    | 1.228    | 0.351 – 4.291  | 0.748        | --          | --     | --      |
| Donor BMI                 | 0.972    | 0.892 – 1.059  | 0.521        | --          | --     | --      |
| Donor hypertension        | 1.903    | 0.231 – 15.673 | 0.550        | --          | --     | --      |
| HLA mismatch              | 1.139    | 0.885 – 1.465  | 0.312        | --          | --     | --      |
| Donor Terminal Creatinine | 0.351    | 0.370 – 3.320  | 0.361        | --          | --     | --      |

(b) Acute tubular injury

| Parameters                 | Crude OR | 95% CI         | p-value      | Adjusted OR | 95% CI        | p-value |
|----------------------------|----------|----------------|--------------|-------------|---------------|---------|
| Donor age (years)          | 1.004    | 0.978 – 1.031  | 0.763        | 0.999       | 0.941 – 1.060 | 0.978   |
| Donor Male                 | 0.478    | 0.243 – 0.941  | <b>0.033</b> | 2.196       | 0.521 – 9.258 | 0.284   |
| Donor African-American     | 0.834    | 0.284 – 2.451  | 0.742        | 0.308       | 0.028 – 3.430 | 0.338   |
| Donor BMI                  | 1.026    | 0.975 – 1.079  | 0.332        | --          | --            | --      |
| Cold ischemia time (hours) | 0.294    | 0.026 – 3.271  | 0.319        | 0.172       | 0.011 – 2.686 | 0.209   |
| Donor hypertension         | 2.232    | 0.459 – 10.858 | 0.320        | --          | --            | --      |
| HLA mismatch               | 1.032    | 0.858 – 1.241  | 0.741        | --          | --            | --      |
| Donor Terminal Creatinine  | 0.300    | 0.0542 – 1.661 | 0.168        | --          | --            | --      |

(c) IFTA

| Parameters <sup>1</sup>    | Crude OR | 95% CI          | p-value      | Adjusted OR | 95% CI         | p-value      |
|----------------------------|----------|-----------------|--------------|-------------|----------------|--------------|
| Donor age (years)          | 1.073    | 1.022 – 1.125   | <b>0.004</b> | 1.083       | 1.027 – 1.141  | <b>0.003</b> |
| Donor Male                 | 1.602    | 0.585 – 4.384   | 0.359        | --          | --             | --           |
| Donor African-American     | 4.216    | 1.395 – 12.745  | <b>0.011</b> | 5.323       | 1.420 – 19.960 | <b>0.013</b> |
| Donor BMI                  | 1.095    | 1.033 – 1.160   | <b>0.002</b> | 1.097       | 1.029 – 1.170  | <b>0.005</b> |
| Donor obese                | 5.175    | 1.818 – 14.728  | <b>0.002</b> | --          | --             | --           |
| Cold ischemia time (hours) | 0.009    | 0.00001 – 7.213 | 0.168        | --          | --             | --           |
| HLA mismatch               | 1.083    | 0.802 – 1.462   | 0.603        | --          | --             | --           |
| Donor Terminal Creatinine  | 6.114    | 0.515 – 72.523  | 0.151        | --          | --             | --           |

(d) Moderate to severe vascular disease

| Parameters <sup>2</sup>   | Crude OR | 95% CI        | p-value          | Adjusted OR | 95% CI        | p-value          |
|---------------------------|----------|---------------|------------------|-------------|---------------|------------------|
| Donor age (years)         | 1.066    | 1.042 – 1.090 | <b>&lt;0.001</b> | 1.069       | 1.044 – 1.095 | <b>&lt;0.001</b> |
| Donor Male                | 1.150    | 0.719 – 1.841 | 0.559            | 1.465       | 0.885 – 2.425 | 0.138            |
| Donor African-American    | 0.685    | 0.295 – 1.590 | 0.378            | --          | --            | --               |
| Donor BMI                 | 1.017    | 0.977 – 1.059 | 0.412            | 1.018       | 0.976 – 1.062 | 0.405            |
| Donor hypertension        | 1.674    | 0.424 – 6.610 | 0.462            | 0.811       | 0.195 – 3.360 | 0.772            |
| HLA mismatch              | 1.000    | 0.871 – 1.148 | 0.996            | --          | --            | --               |
| Donor Terminal Creatinine | 0.956    | 0.279 – 3.273 | 0.973            | --          | --            | --               |

<sup>1</sup>Donor hypertension predicts failure perfectly; <sup>2</sup>Donor diabetes predicts failure perfectly

**eTable 3.** Multivariable Cox model using optimal histology DDRT as the reference group

| Parameters             | HR    | Std. Err. | P value | 95% Confidence Interval |
|------------------------|-------|-----------|---------|-------------------------|
| Donor Race (Black)     | 1.344 | 0.237     | 0.093   | 0.951 - 1.900           |
| Donor Hypertension     | 0.993 | 0.178     | 0.967   | 0.698 - 1.411           |
| Recipient Race (Black) | 1.043 | 0.185     | 0.811   | 0.737 - 1.476           |
| Recipient Diabetes     | 0.886 | 0.138     | 0.435   | 0.653 - 1.201           |
| HLA Mismatch           | 1.062 | 0.055     | 0.248   | 0.959 - 1.177           |
| Optimal DDRT           | Ref   |           |         |                         |
| Suboptimal DDRT        | 1.477 | 0.267     | 0.031   | 1.036 - 2.104           |
| Suboptimal LRT         | 0.571 | 0.153     | 0.036   | 0.338 - 0.964           |
| Optimal LRT            | 0.516 | 0.113     | 0.002   | 0.337 - 0.792           |
